# Supplementary material for: Tract- and gray matter- based spatial statistics show white matter and gray matter microstructural differences in autistic males
Source: Front Neurosci. 2023 Sep 27;17:1231719. doi: 10.3389/fnins.2023.1231719 (PMC10565827; doi:10.3389/fnins.2023.1231719)
Supplement: Supplementary file 1 [file Data_Sheet_2.DOCX]

Supplementary Material

**Tract- and Gray Matter- Based Spatial Statistics Show White Matter and Gray Matter Microstructural Differences in Autistic Males**

**Authors**: Marissa DiPiero1,2, Hassan Cordash2, Molly B. Prigge3, Carolyn K. King3, Jubel Morgan3, Jose Guerrero-Gonzalez2, Nagesh Adluru2,4, Jace B. King3, Nicholas Lange5, Erin D. Bigler3,6,7,8,9, Brandon A. Zielinski3,6,10,11,12, Andrew Alexander2,13,14, Janet E. Lainhart2,13, and Douglas C. Dean III2,14,15

1Neuroscience Training Program, University of Wisconsin-Madison, Madison, WI

2Waisman Center, University of Wisconsin-Madison, Madison, WI

3Department of Radiology and Imaging Sciences, University of Utah, Salt Lake City, UT

4 Department of Radiology, University of Wisconsin-Madison, Madison, WI

5Department of Psychiatry, Harvard School of Medicine, Boston, MA

6Department of Neurology, University of Utah, Salt Lake City, UT

7Department of Psychiatry, University of Utah, Salt Lake City, UT

8Psychology and Neuroscience Center, Brigham Young University, Provo, UT

9Neurology, University of California-Davis, Davis, CA

10Department of Pediatrics, University of Utah, Salt Lake City, UT

11Departments of Pediatrics and Neurology, University of Florida, Gainesville, FL

12 McKnight Brain Institute, University of Florida, Gainesville, FL

13Department of Psychiatry, University of Wisconsin-Madison, Madison, WI

14Department of Medical Physics, University of Wisconsin-Madison, Madison, WI

15Department of Pediatrics, University of Wisconsin-Madison, Madison, WI

*Address Correspondence to:* Douglas C. Dean III

Waisman Center

University of Wisconsin–Madison

Madison, WI, USA, 53705

Tel. # +1 608.262.6706

Email: [deaniii@wisc.edu](mailto:deaniii@wisc.edu)

**
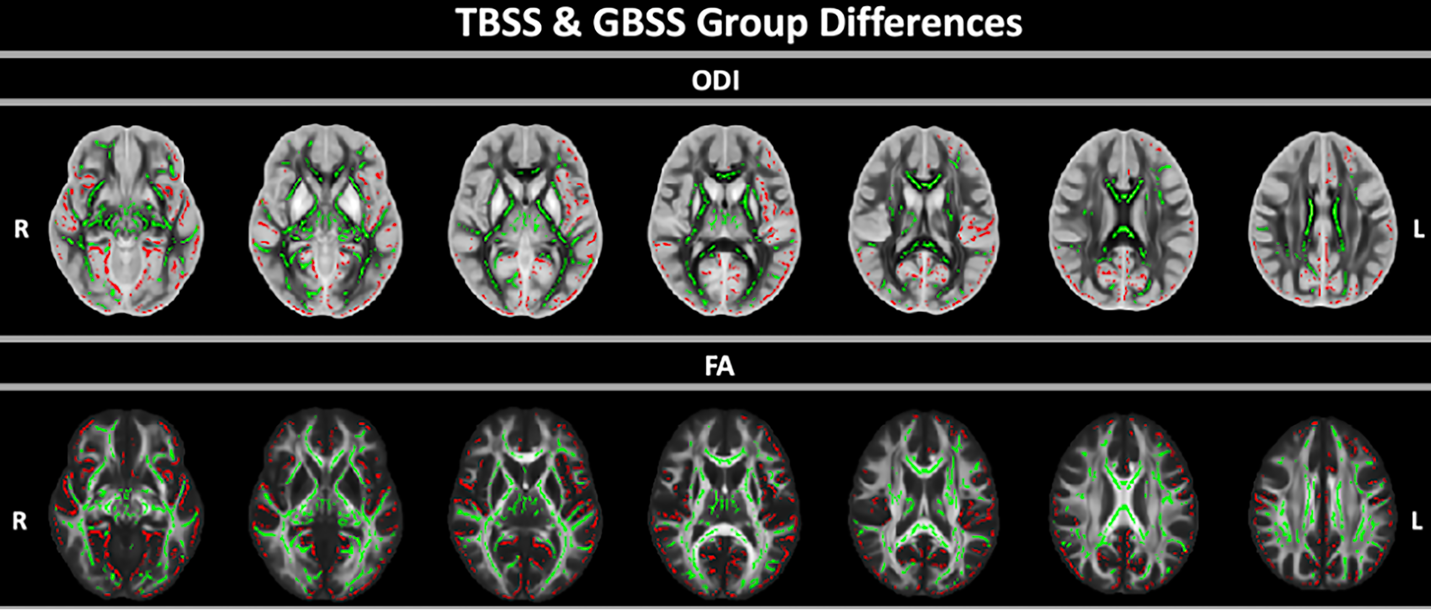
**

**Supplement Figure 1:** TBSS and GBSS Group Differences in ODI and AD. Green voxels represent white matter voxels displaying a significant group difference. Red voxels represent gray matter voxels displaying a significant group difference.


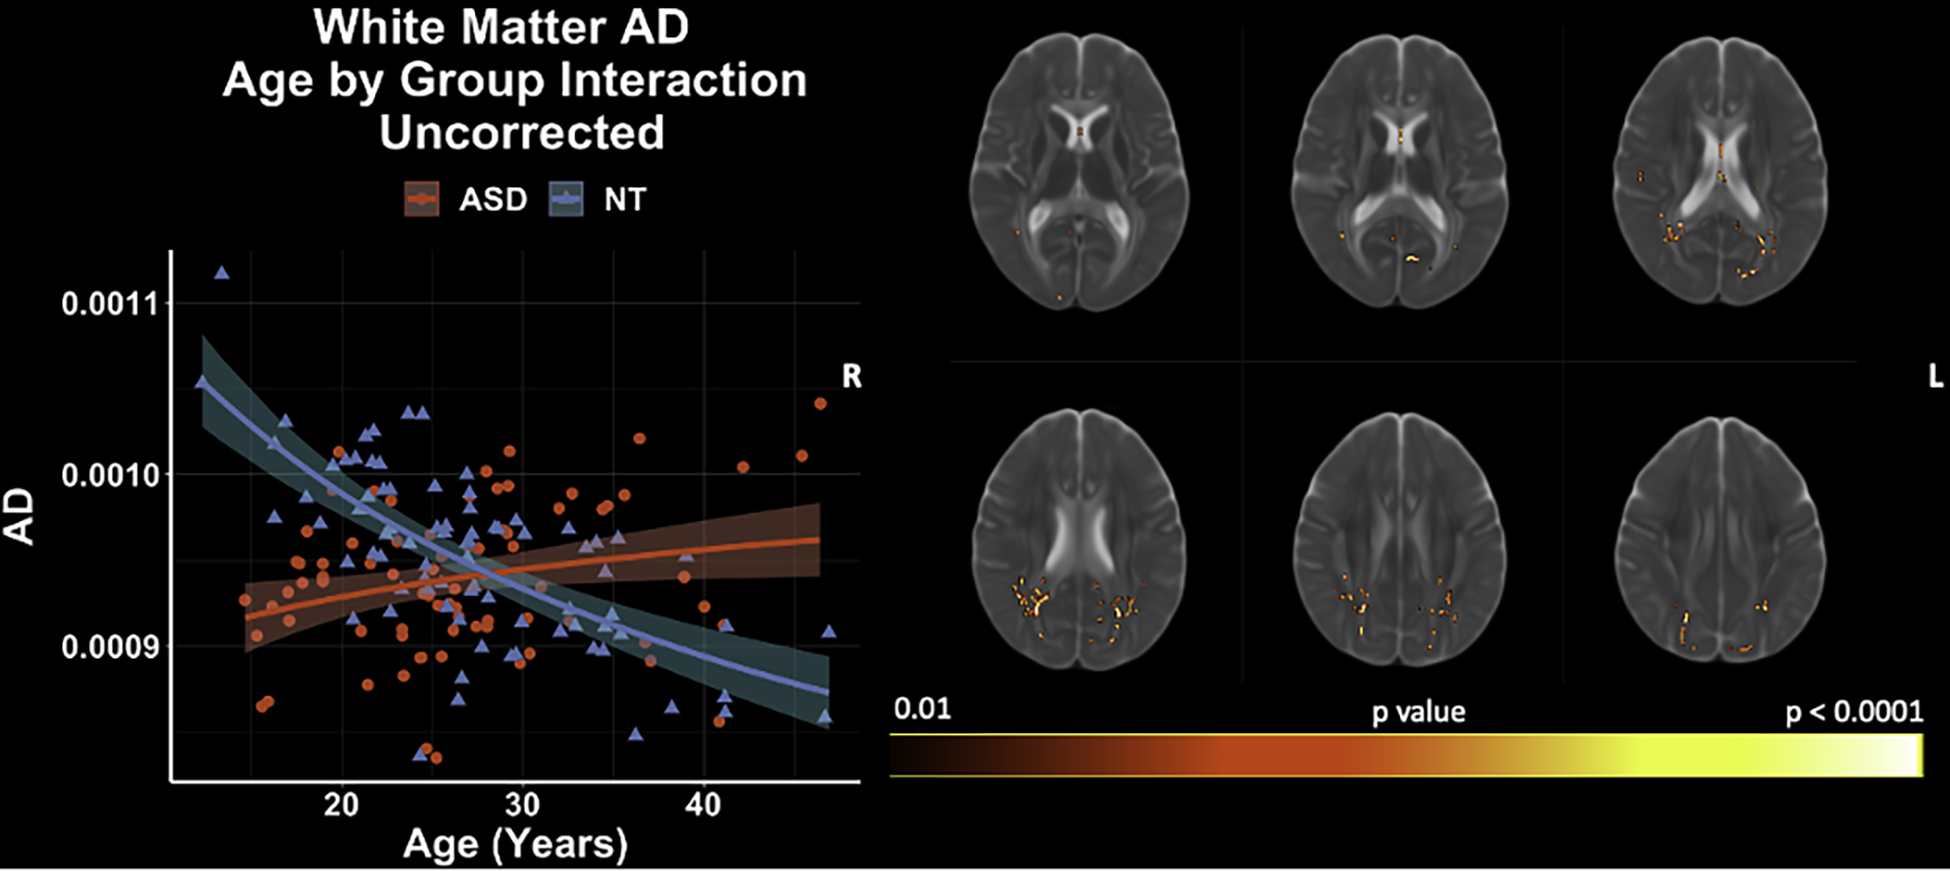


**Supplement Figure 2:** Uncorrected Age-by-group Interactions on white matter in TBSS analysis.


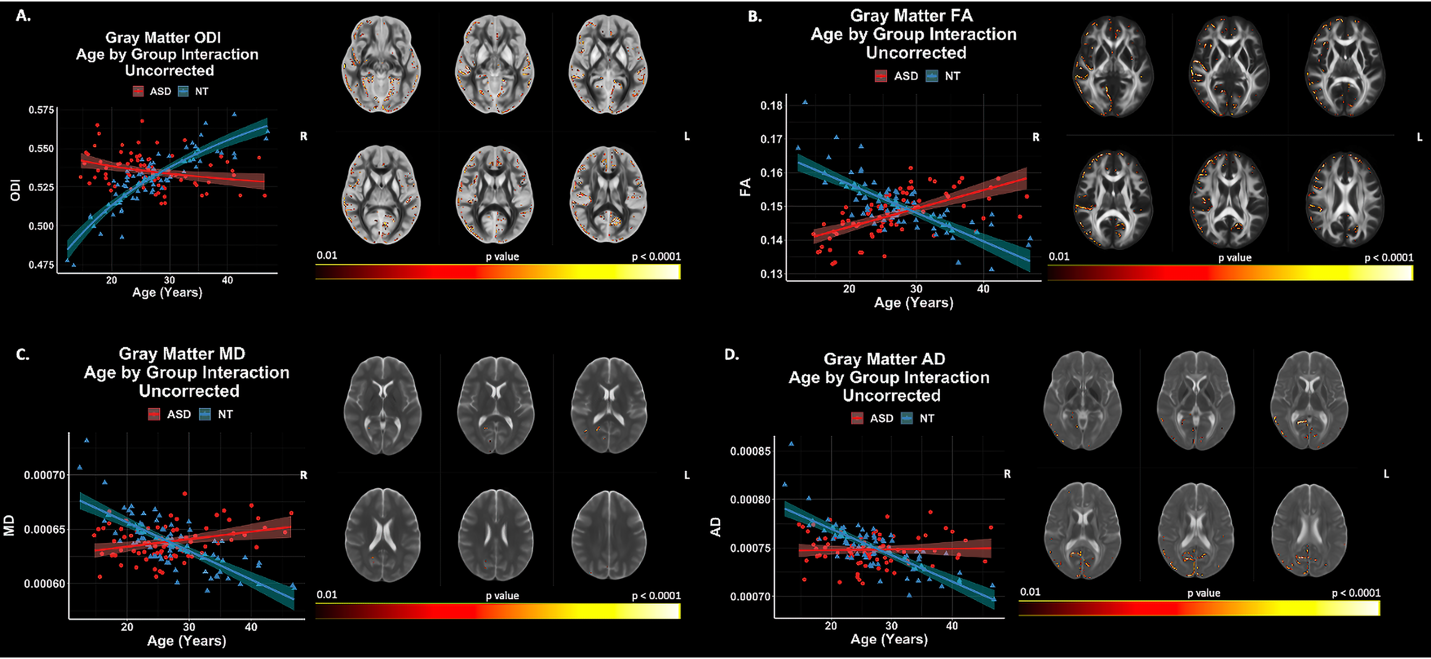


**Supplement Figure 3:** Uncorrected age-by-group interactions on gray matter in GBSS analysis.

| **Supplement Table 1: Neuroanatomical Locations of Significant Group Differences in White Matter** | | | | | | |
| --- | --- | --- | --- | --- | --- | --- |
| **Hemisphere** | **DWI Measures** | | | | | |
|  | **FICVF** | **ODI** | **FA** | **MD** | **RD** | **AD** |
| **Bilateral** | – Anterior corona radiata  – Body of corpus callosum  – External capsule  – Fornix  – Genu of corpus callosum  – Posterior corona radiata  – Posterior thalamic radiation  – Retrolenticular part of internal capsule  – Sagittal stratum  – Superior corona radiata  – Superior longitudinal fasciculus  – Uncinate fasciculus | – Anterior corona radiata  – Anterior limb of internal capsule  – Body of corpus callosum  – Cerebellar penducle  – Cerebral peduncle  – Corticospinal tract  – External capsule  – Fornix  – Genu of corpus callosum  – Inferior cerebellar peduncle  – Medial leminiscus  – Pontine crossing tract  – Posterior limb of internal capsule  – Posterior thalamic radiation  – Retrolenticular part of internal capsule  – Sagittal stratum  – Splenium of corpus callosum  – Superior cerebellar peduncle  – Superior corona radiata  – Superior longitudinal fasciculus | – Anterior limb of internal capsule  – Body of corpus callosum  – External capsule  – Fornix  – Genu of corpus callosum  – Posterior corona radiata  – Posterior limb of internal capsule  – Retrolenticular part of internal capsule  – Sagittal stratum  – Splenium of corpus callosum  – Superior longitudinal fasciculus | – | – Anterior corona radiata  – Body of corpus callosum  – External capsule  – Genu of corpus callosum  – Posterior limb of internal capsule  – Retrolenticular part of internal capsule  – Splenium of corpus callosum  – Superior corona radiata  – Superior longitudinal fasciculus | – Cerebral peduncle  – Corticospinal Tract  – Inferior cerebellar peduncle  – Posterior limb of internal capsule  – Superior cerebellar peduncle |
| **Left** | – Anterior limb of internal capsule  – Cingulum (hippocampus)  – Posterior thalamic radiation  – Superior fronto-occipital fasciculus |  | – Cingulum (hippocampus) | – | – Posterior thalamic radiation | – Anterior limb of internal capsule  – Medial leminiscus  –Retrolenticular part of internal capsule |
| **Right** | – Anterior limb of internal capsule  – Cingulum (hippocampus)  – Posterior thalamic radiation  – Superior fronto-occipital fasciculus  – Cingulum (cinguluate gyrus)  – Splenium of corpus callosum  – Tapetum |  | – Superior corona radiata  – Anterior corona radiata  – Cerebral peduncle | – Anterior corona radiata  – Genu of corpus callosum | – Posterior corona radiata  – Sagittal stratum | – Middle cerebellar peduncle |

| **Supplement Table 2: Neuroanatomical Locations of Significant Group Differences in Gray Matter** | | | | | | | |
| --- | --- | --- | --- | --- | --- | --- | --- |
| **Hemisphere** | **DWI Measures** | | | | | | |
|  | **FICVF** | **ODI** | **FA** | **MD** | **RD** | **AD** |
| **Bilateral** | – | – Angular gyrus  – Cingulate gyrus, posterior division  – Cuneal cortex  – Frontal orbital cortex  – Frontal pole  – Intracalcarinal cortex  – Lateral occipital cortex, superior division  – Lingual gyrus  – Middle temporal gyrus, posterior division  – Occipital fusiform gyrus  – Parahippocampal gyrus  division  – Parietal operculum cortex  – Planum pole  – Precuneus cortex  – Superior temporal gyrus, anterior division  – Supramarginal gyrus, posterior division  – Temporal pole | – Central opercular cortex  – Cingulate gyrus, posterior division  – Frontal orbital cortex  – Frontal pole  – Inferior frontal gyrus, pars opercularis  – Insular cortex  – Lateral occipital cortex, superior division  – Lingual gyrus  – Middle temporal gyrus, posterior division  – Middle temporal gyrus, temporo occipital part  –Occipital Pole  – Paracingulate gyrus  – Parahippocampal gyrus  – Precentral gyrus  – Precuneus cortex  – Subcallosal cortex  – Temporal fusiform cortex, posterior division  – Temporal pole | – | – | – |
| **Left** | – | – Temporal occipital fusiform  – Occipital pole  – Lateral occipital cortex, inferior division  – Central opercular cortex  – Insular cortex  – Central opercular cortex  – Frontal operculum cortex  – Inferior frontal gyrus, pars triangularis  – Cingulate gyrus, anterior division  – Postcentral gyrus  – Paracingulate gyrus  – Precentral gyrus  – Middle frontal gyrus  – Paracingulate gyrus  – Superior frontal division  – Supramarginal gyrus, anterior division | – Cingulate gyrus, anterior division  – Inferior frontal gyrus, pars triangularis  – Lateral occipital cortex, inferior division  – Middle frontal gyrus  – Occipital fusiform gyrus, superior frontal division  – Temporal occipital fusiform cortex  – Middle temporal gyrus, anterior division  – Middle temporal gyrus, posterior division | – | – | – |
| **Right** | – | – | – | – | – | – |

| **Supplement Table 3: Neuroanatomical Locations of Significant ADOS Relationships in White Matter** | | | | | | |
| --- | --- | --- | --- | --- | --- | --- |
| **Hemisphere** | **DWI Measures** | | | | | |
|  | **FICVF** | **ODI** | **FA** | **MD** | **RD** | **AD** |
| **Bilateral** | – | – | – Genu of corpus callosum  – Body of corpus callosum  – Splenium of corpus callosum  – Middle cerebellar peduncle | – | – | – |
| **Left** | – | – | – | – | – | – |
| **Right** | – | – | – Anterior corona radiata  – Posterior thalamic radiation | – | – | – Body of corpus callosum |
